# Supplementary material
Source: publisher site journal article supplement (https://www.dovepress.com/get_supplementary_file.php?f=287434.docx)
Supplement: Supplementary file 1 [file get_supplementary_file.php]

**Supplementary data**

**Optimization, Characterization and *in vivo* Evaluation of** **Paclitaxel-Loaded Folate-Conjugated Superparamagnetic Iron Oxide Nanoparticles**

Gang Gui a1, Ziqi Fan a1, Yihuan Ning a, Cancan Yuan c, Baolin Zhang b* and Qin Xu a*

a College of Pharmacy, Guilin Medical University, Guilin 541004, People’s Republic of China

b College of Materials Science and Engineering, Guilin University of Technology, Guilin 541004, People’s Republic of China

c Department of Pharmacy, Luohe city people's hospital, Luohe 462000, People’s Republic of China

1 Gang Gui and Ziqi Fan are contributed equally to this work.

*Correspondence: Qin Xu, College of Pharmacy, Guilin Medical University, Guilin 541004, People’s Republic of China, Email: [xuqincpu@126.com](mailto:xuqincpu@126.com)

Baolin Zhang, College of Materials Science and Engineering, Guilin University of Technology, Guilin 541004, People’s Republic of China, Email: [zhangbaolin@glut.edu.cn](mailto:zhangbaolin@glut.edu.cn)

**Experimental Section**

**Synthesis of SPTX**

PTX was modified using a similar method as described in previous study1. In brief, PTX was modified by succinic anhydride. PTX (20 mg, 0.023 mmol) was dissolved in 2 mL of dry pyridine and then mixed with DMAP (0.88 mg, 0.0072 mmol), and succinic anhydride (20 mg, 0.2 mmol) via magnetic stirring for 12 h at room temperature. The residue was treated with 10 mL of water, stirred for 20 min, and filtered. The precipitate was dissolved in acetone, water was slowly added, and the tine crystals were collected. The crystals (SPTX) were purified by chromatography on a SiO2 (30×2.5 cm) column gradient eluted with chloroform-methanol mixture (98:2 to 85:15) as determined by TLC (Rf=0.27, chloroform-methanol=90:10) and 1H-NMR. Scheme of the synthesis is illustrated in Figure S1.





**Figure S1** Scheme of synthesis for preparation of SPTX.

The retention time was 6.14 min for PTX and 4.22 min for SPTX (Figure S2)


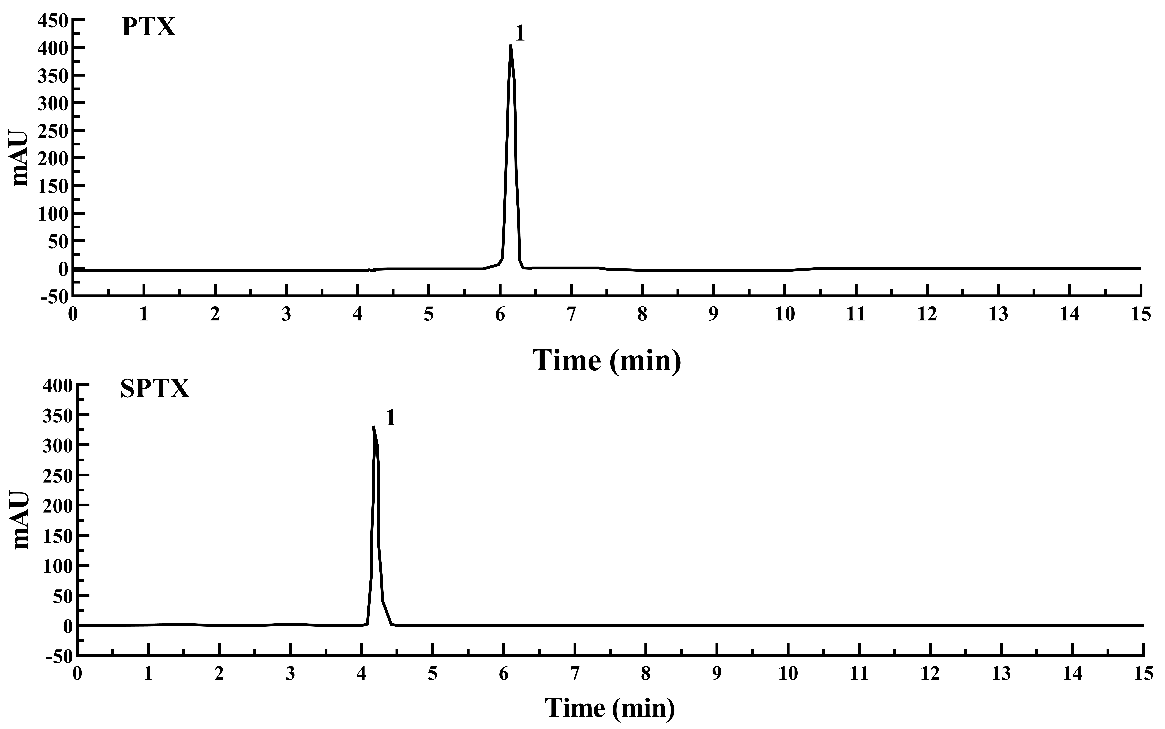


**Figure S2** HPLC of PTX and SPTX.

The chemical structures of SPTX was characterized by 1H-NMR. The results were as follows (Figure S3): 1H-NMR (400 MHz, Chloroform-d) δ 8.15 (d, *J*=7.2 Hz, 2-OBz), 7.74 (d, *J*=6.8 Hz, 3′-NBz), 7.52 (m, 2-OBz), 7.41 (m, 3′-NBz), 7.26 (s, 3′-ph), 7.22 (d, *J*=9.3 Hz, NH), 6.29 (s, 10CH), 6.22 (t, *J*=8.8 Hz, 13CH), 5.98 (dd, *J*=4 Hz, 8 Hz, 3′CH), 5.69 (d, *J*=4.4 Hz, 2CH), 5.51 (d, *J*=3.6 Hz, 2′CH), 4.96 (d, *J*=7.2 Hz, 5CH), 4.43 (dd, *J*=6.8 Hz, 11 Hz, 7CH), 4.29 (d, *J*=8.0 Hz, 20CH2), 4.22 (d, *J*=8.0 Hz, 20CH2). 3.80 (d, *J*=7.0 Hz, 3CH3), 2.55-2.76 (m, HOOC-CH2CH2-COO), 2.43 (m, OAC), 2.21 (m, OAC), 1.91 (s, 18CH3), 1.68 (s, 19CH3), 1.22 (s, 16CH3), 1.14 (s, 17CH3).


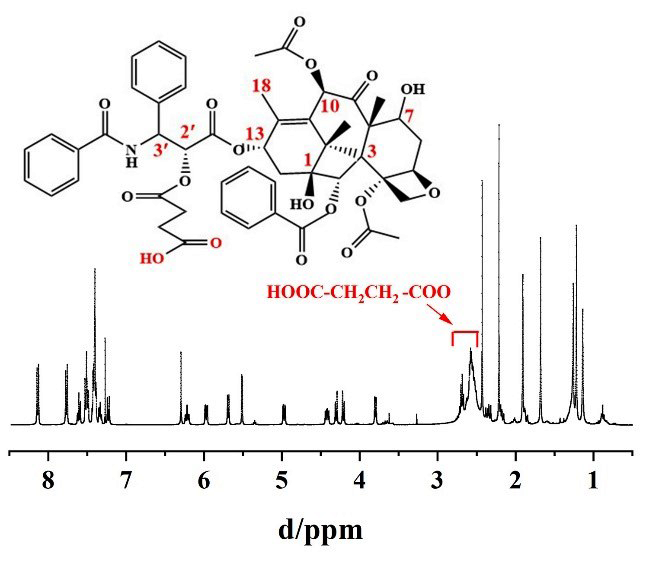


**Figure S3** 1H-NMR spectrum of SPTX (400 MHz, Chloroform-d).

**References**

1. Liu D, Wu W, Chen X, et al. Conjugation of paclitaxel to iron oxide nanoparticles for tumor imaging and therapy. Nanoscale. 2012;4(7):2306-2310. doi:10.1039/c2nr11918h
